# Supplementary material for: AZABODIPY aggregates as a promising electroluminescent material for sustainable NIR OLED applications
Source: Royal Society of Chemistry journal article supplement (doi:10.1039/d3ma00006k), 2023-01-01
Supplement: d3ma00006k1.pdf [file d3ma00006k1.pdf]

## **Supporting Information**

### **AZABODIPY aggregates as a promising electroluminescent material for sustainable NIR OLED applications**

Wojciech Mróz, Benedetta Maria Squeo, Barbara Vercelli, Chiara Botta, Mariacecilia Pasini

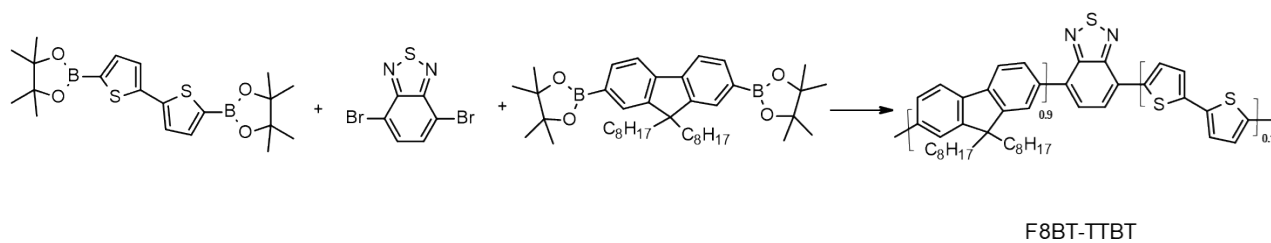

Scheme S1. Synthesis route of F8BT-TTBT polymer.

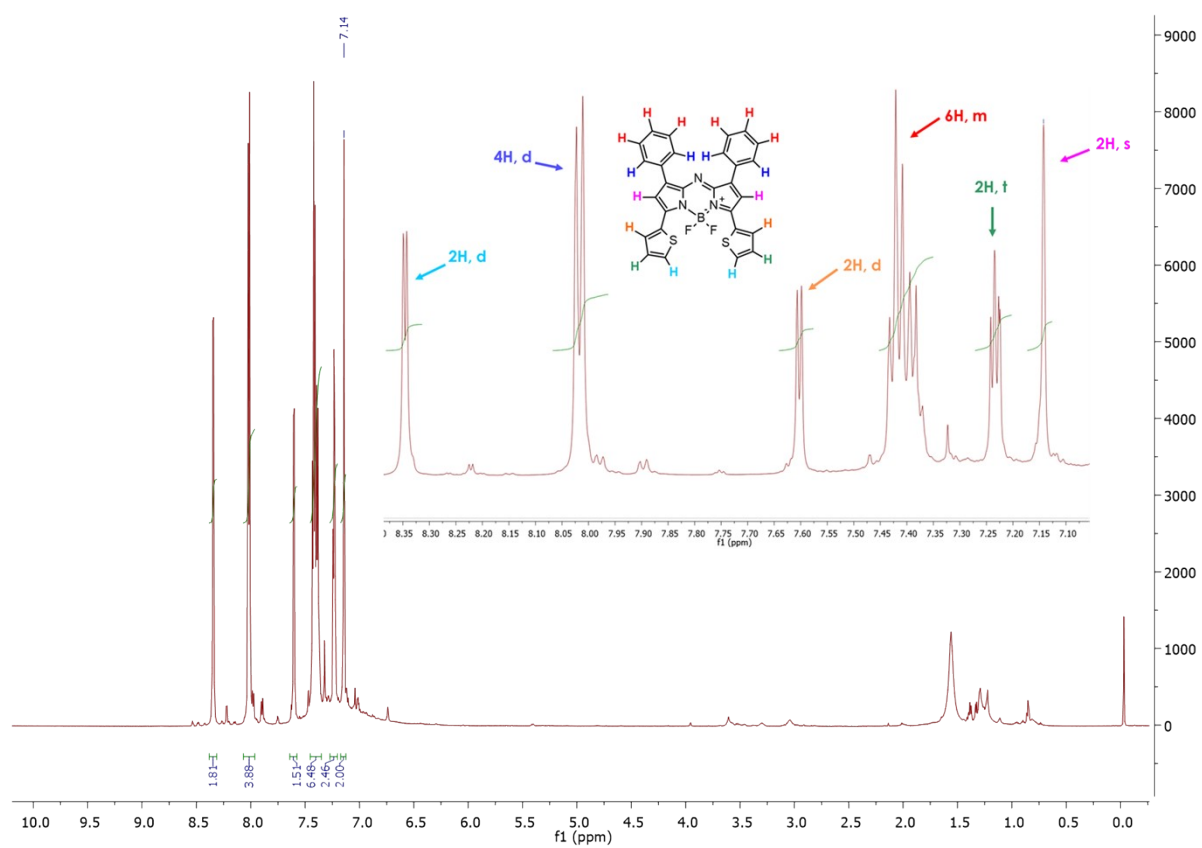

Fig. S1.  $^1\text{H}$ -NMR spectrum of DTDPA molecule.

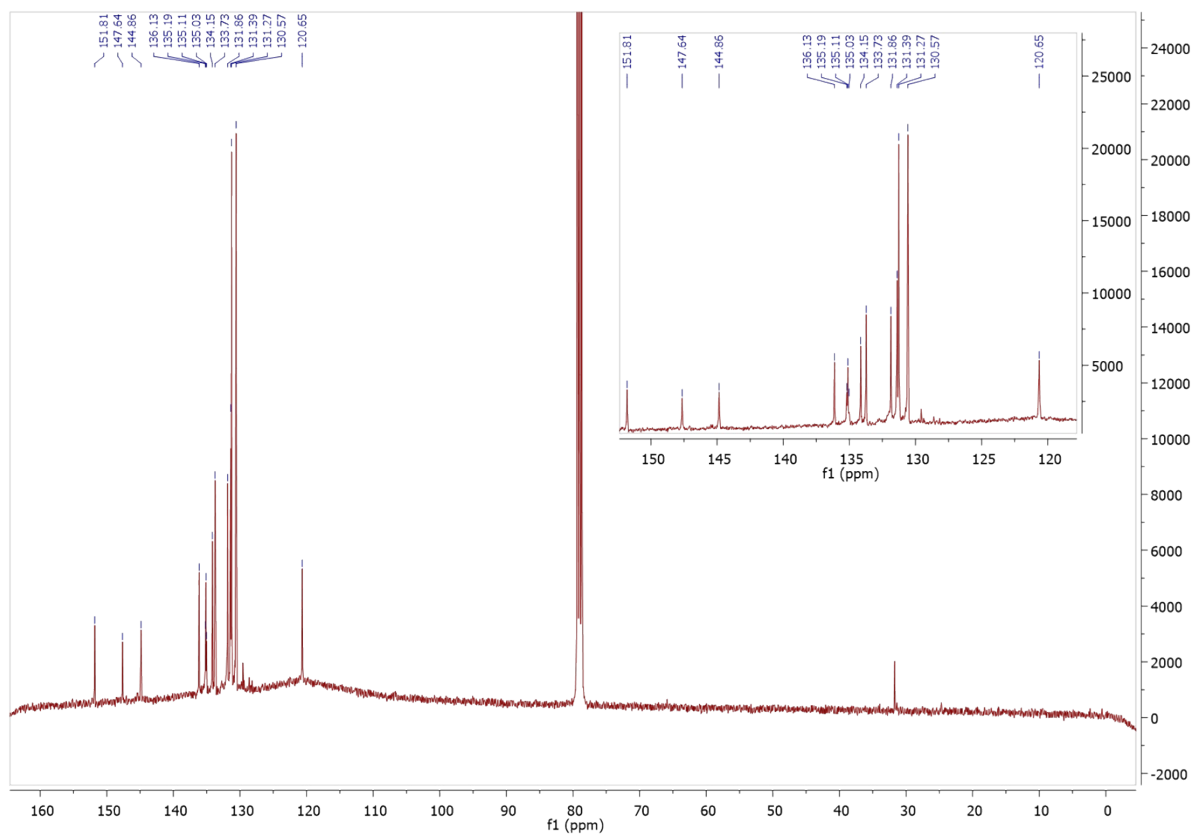

Fig. S2.  $^{13}\text{C}$ -NMR spectrum of DTD PAB molecule.

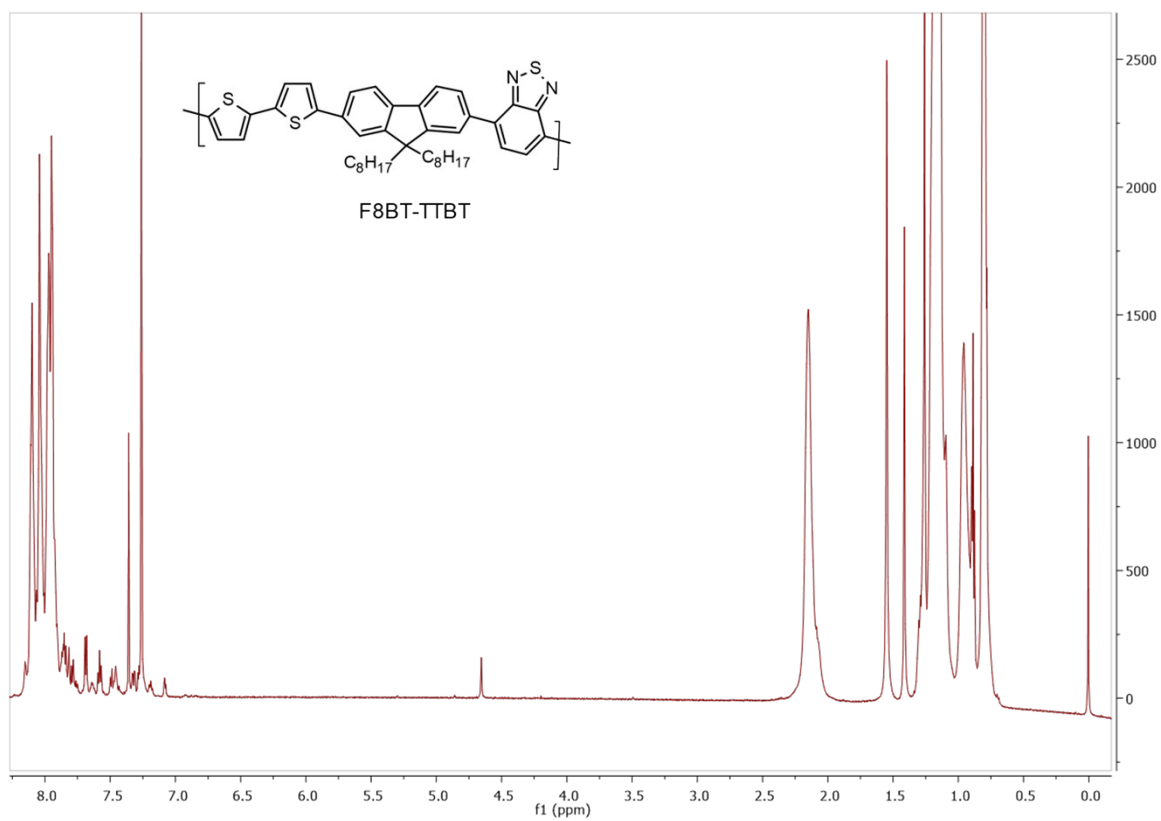

Fig. S3.  $^1\text{H}$ -NMR spectrum of F8BT-TTBT polymer.

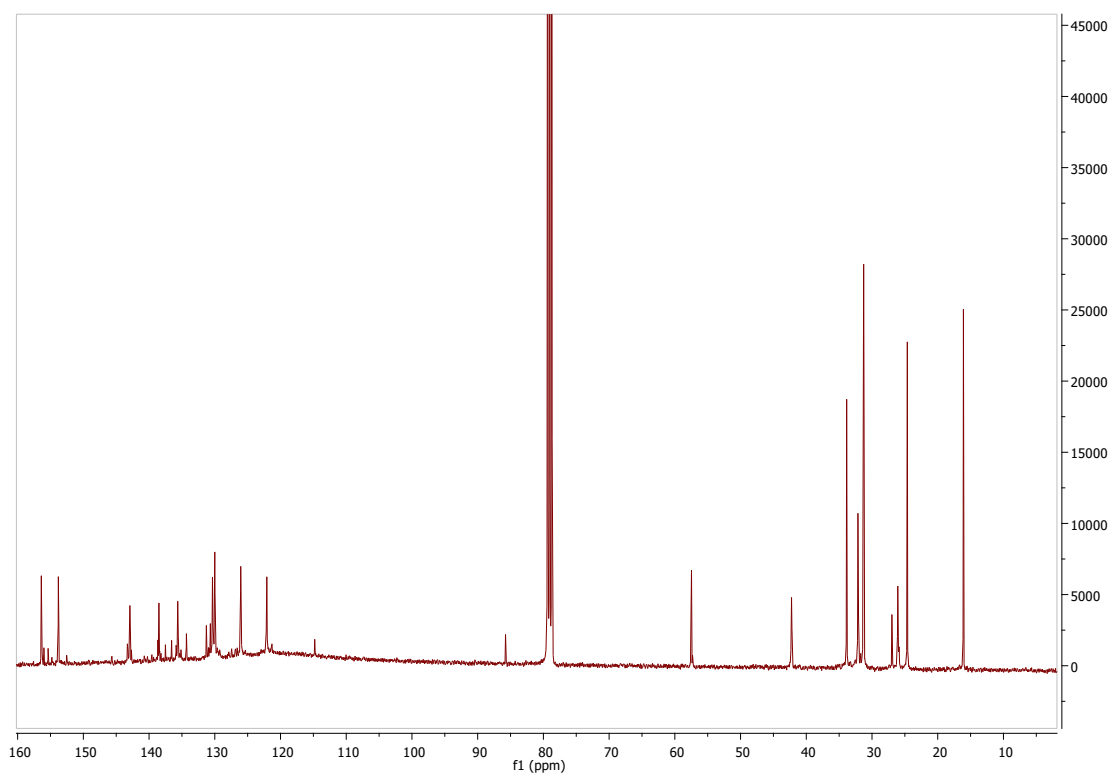

Fig. S4.  $^{13}\text{C}$ -NMR spectrum of F8BT-TTBT polymer.

Table S1. Optical properties of DTDPAB in toluene and chloroform solutions at concentration  $10^{-5}\text{M}$  and as a dropcasted film.

|             | Absorption (nm) | PLE max (nm) | PL max (nm) | PL QY (%) exc. 488nm | $\tau_{\text{av}}$ (ns) (exc. 408nm) |
|-------------|-----------------|--------------|-------------|----------------------|--------------------------------------|
| Toluene     | 721             | 345, 721     | 734         | $47 \pm 5$           | 3.03 (734 nm); 3.04 (820 nm)         |
| Chloroform  | 720             | 347, 719     | 733         | $43 \pm 4$           | 3.32 (732 nm)                        |
| Casted film | 777             | -            | 930         | $< 0.1$              | $304 \cdot 10^{-3}$                  |

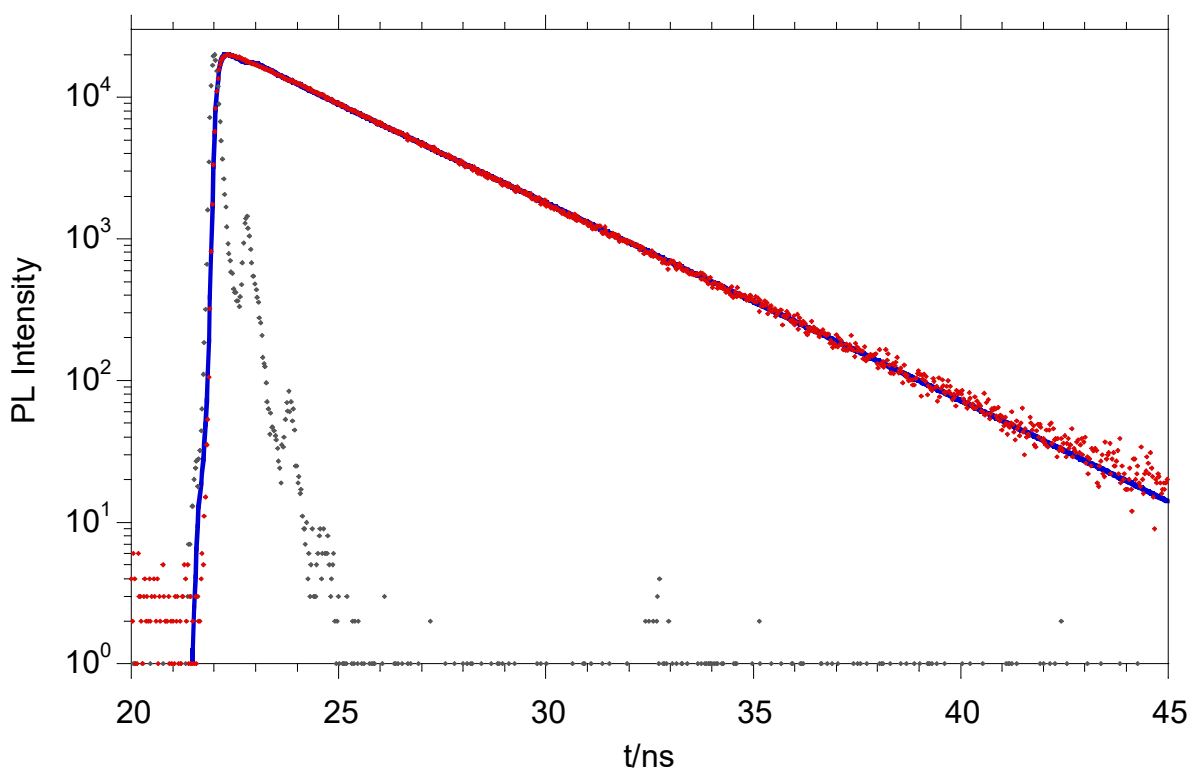

Fig. S5. PL decay of toluene solution of DTDPA at 734nm, excited at 408nm. Bi-exponential fit ( $T1 = 5.374469E-10$  sec,  $T2 = 3.122783E-09$  sec,  $B1 = 2.489714E-02$  [3.40 Rel. Ampl],  $B2 = 0.1217602$  [96.60 Rel. Ampl],  $CHISQ = 2.27528$ ).

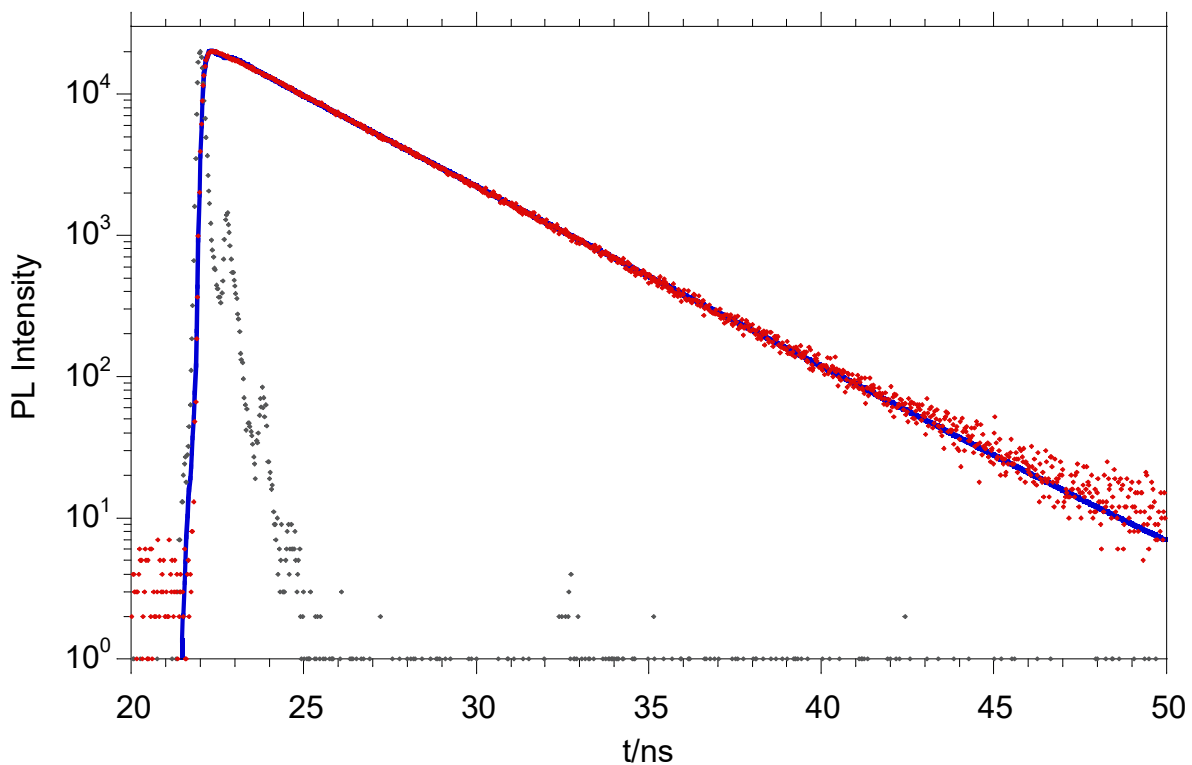

Fig. S6. PL decay of chloroform solution of DTDPA at 732nm, excited at 408nm. Bi-exponential fit ( $T1 = 5.447399E-10$  sec,  $T2 = 3.404215E-09$  sec,  $B1 = 2.328718E-02$  [2.96 Rel. Ampl],  $B2 = 0.1221145$  [97.04 Rel. Ampl],  $CHISQ = 2.05874$ ).

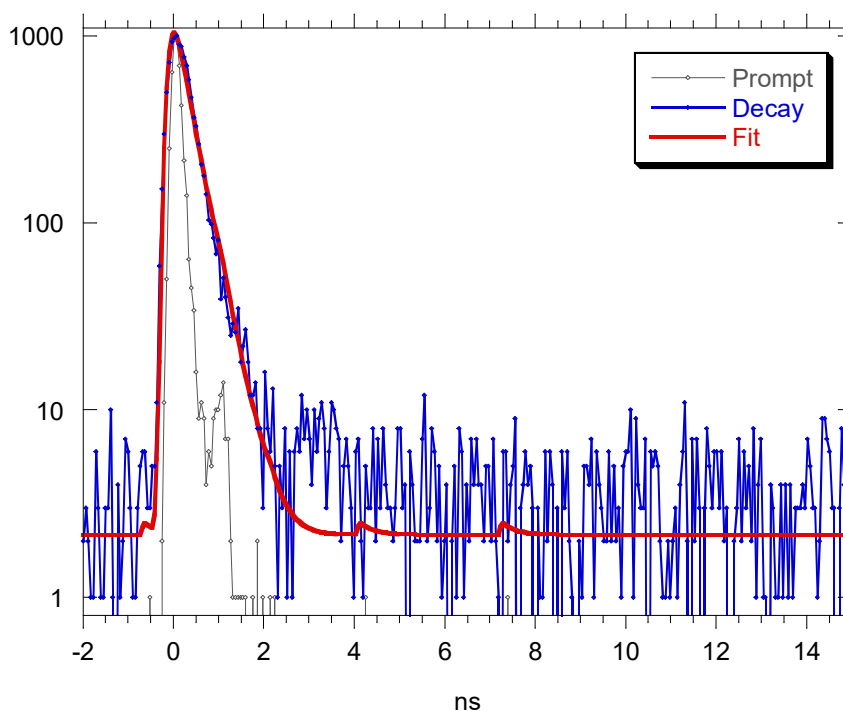

Fig. S7. PL decay of a cast film of DTDPAB at 840nm, excited at 407nm. The red line is a monoexponential fit (lifetime 304 ps, CHISQ = 1.778482). Fitting parameters T1 = 3.04299E-10 sec, S. Dev = 5.709041E-12 sec, A = 1.996751, S. Dev = 5.288644E-02, B1 = 0.4585481, [100.00 Rel. Ampl], S. Dev = 4.40858E-03, CHISQ = 1.778482, [ 829 degrees of freedom].

Table S2. Oxidation and reduction potentials derived from cyclic voltammetry, HOMO and LUMO energy levels, absorption maxima and energy band gaps derived from optical and electrochemical measurements of F8BT, F8BT-TTBT and DTDPAB. HOMO and LUMO energy levels were estimated according to  $E_{HOMO/LUMO} = -4.39 + (0.34 + E_{ox/red})$ , where  $E_{ox/red}$  are the onset oxidation and reduction potential, respectively, vs Ag/Ag<sup>+</sup> electrode (0.34 V vs SCE).<sup>1</sup> The precision of the measurement was  $\pm 0.01$  V.

| Sample           | E <sub>ox</sub><br>(V) | E <sub>red</sub><br>(V) | HOMO<br>(eV) | LUMO<br>(eV) | λ <sub>max</sub><br>(nm) | E <sub>gopt</sub><br>(eV) | E <sub>gel</sub><br>(eV) |
|------------------|------------------------|-------------------------|--------------|--------------|--------------------------|---------------------------|--------------------------|
| <b>F8BT</b>      | 0.99                   | -1.84                   | -5.72        | -2.89        | 324; 455                 | 2.73                      | 2.83                     |
| <b>F8BT-TTBT</b> | 0.97                   | -1.8                    | -5.70        | -2.93        | 319; 450;<br>530         | 2.34                      | 2.77                     |
| <b>DTDPAB</b>    | 0.57                   | -0.65                   | -5.30        | -4.08        | 321; 453                 | 1.72                      | 1.22                     |

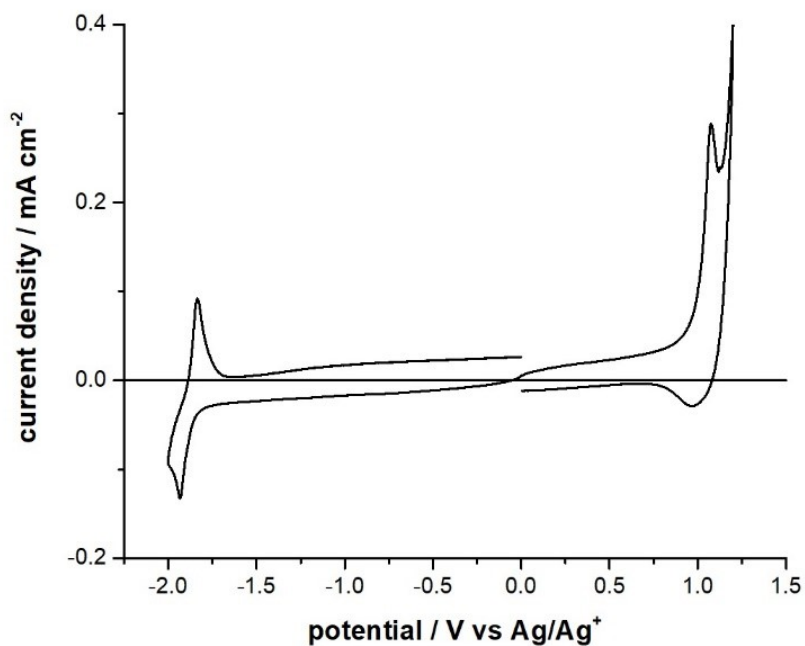

Fig S8. Cyclic Voltammogram of F8BT polymer in acetonitrile + 0.1 M  $\text{Bu}_4\text{NClO}_4$ . Scan rate: 0.1  $\text{V s}^{-1}$ .

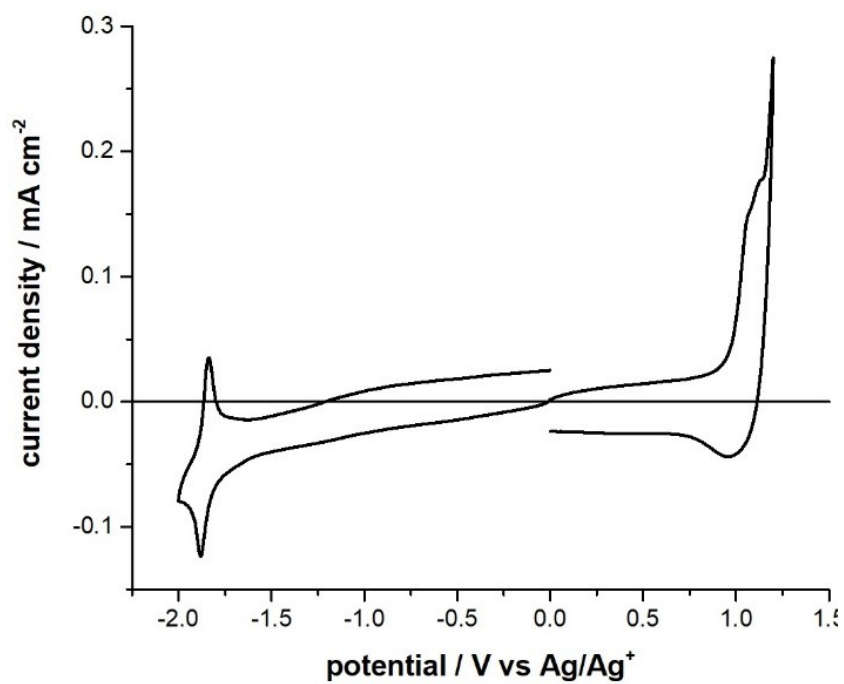

Fig. S9. Cyclic Voltammogram of F8BT-TTBT polymer in acetonitrile + 0.1 M  $\text{Bu}_4\text{NClO}_4$ . Scan rate: 0.1  $\text{V s}^{-1}$ .

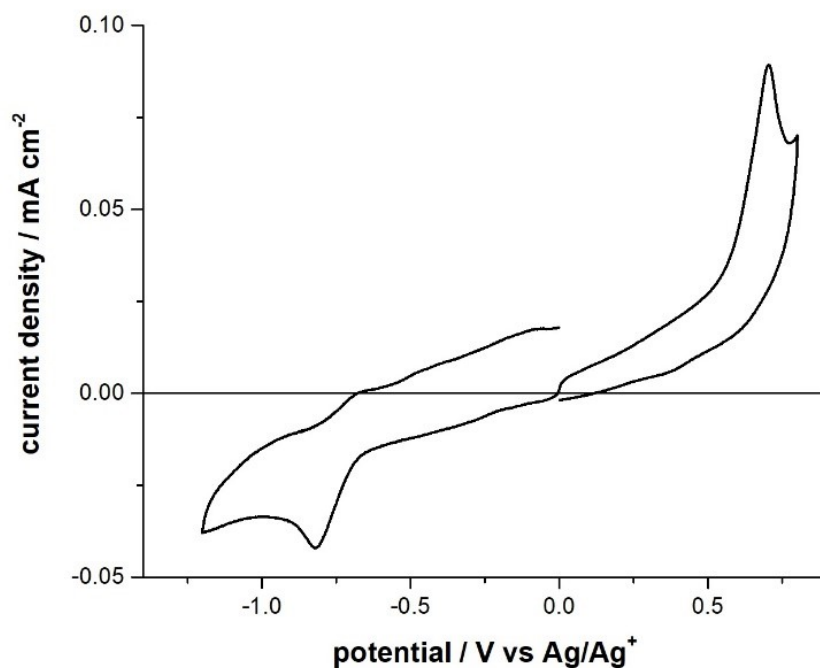

Fig S10. Cyclic Voltammograms of DTDPA molecule, in acetonitrile + 0.1 M  $\text{Bu}_4\text{NClO}_4$ . Scan rate:  $0.1 \text{ V s}^{-1}$ .

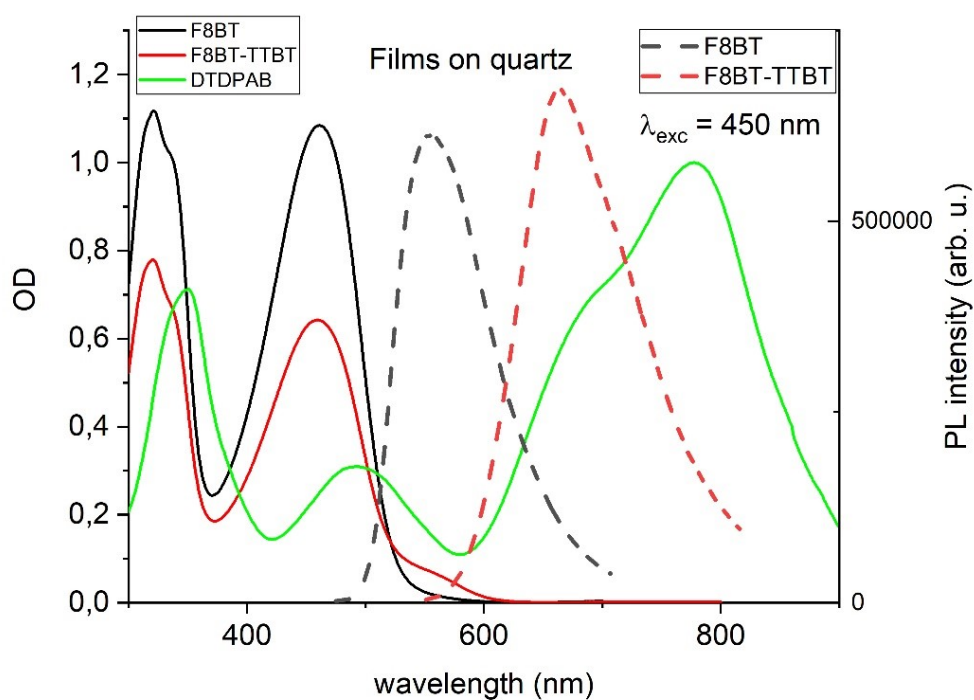

Fig. S11. Absorption of F8BT, F8BT-TTBT and DTDPA films (solid lines) and PL of F8BT and F8BT-TTBT films (dashed lines). The overlap of DTDPA absorption and the polymers PL is better for F8BT-TTBT.



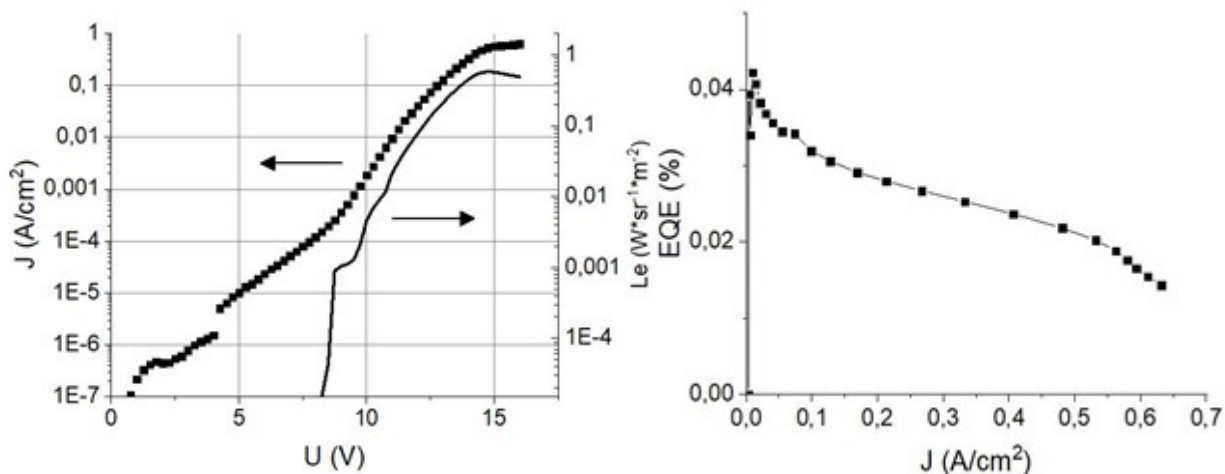

Fig. S12. J-V- $L_e$  curves and EQE of ITO / PEDOT:PSS / PVK / 95% F8BT : 5% DTD PAB / Ba / Al device.

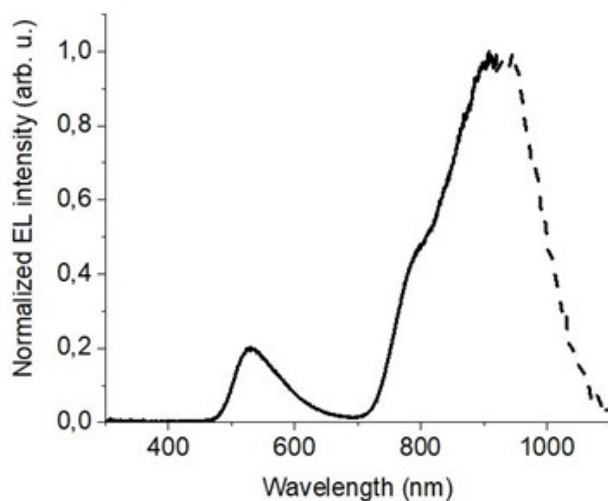

Figure S13. EL at 100 mA/cm<sup>2</sup> of ITO / PEDOT:PSS / PVK / 20% F8BT : 80% DTD PAB / Ba / Al device. Dashed line shows simulated extrapolation of the spectrum.

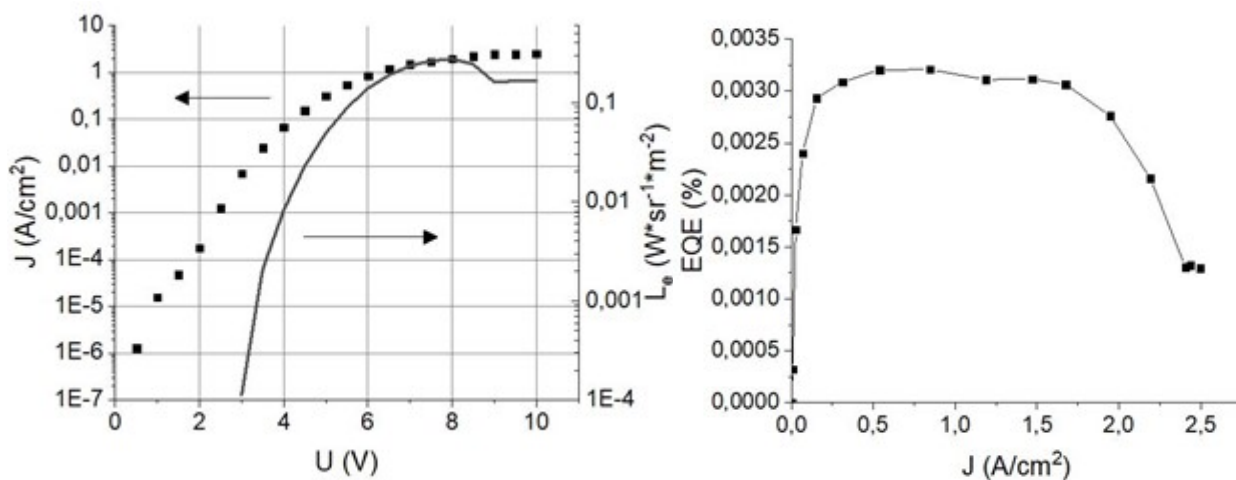

Figure S14. J-V- $L_e$  curves and EQE of ITO / PEDOT:PSS / PVK / 20% F8BT : 80% DTD PAB / Ba / Al device.

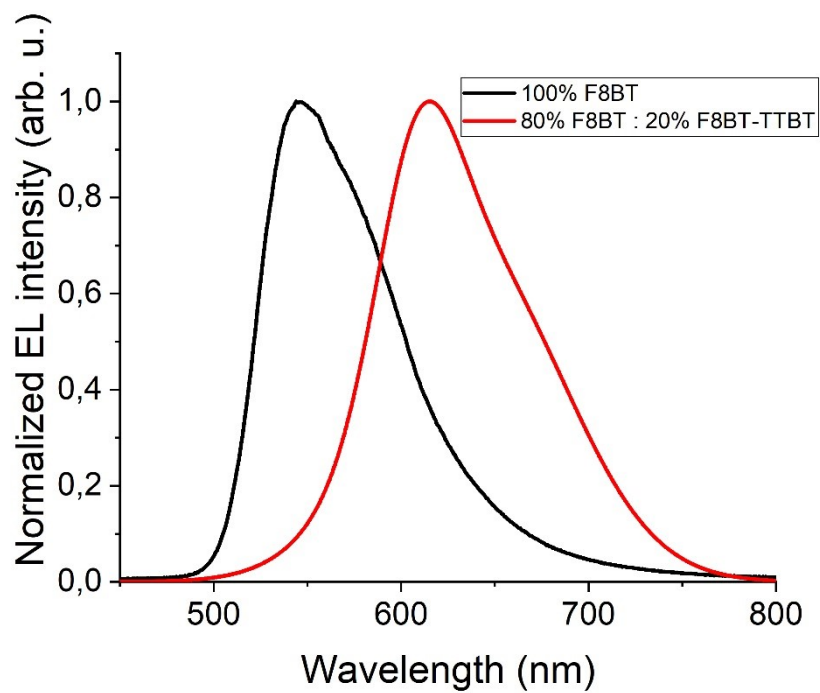

Fig. S15. Normalized electroluminescence spectra of devices with the emitting layers consisting of 100% F8BT and 80% F8BT : 20% F8BT-TTBT.

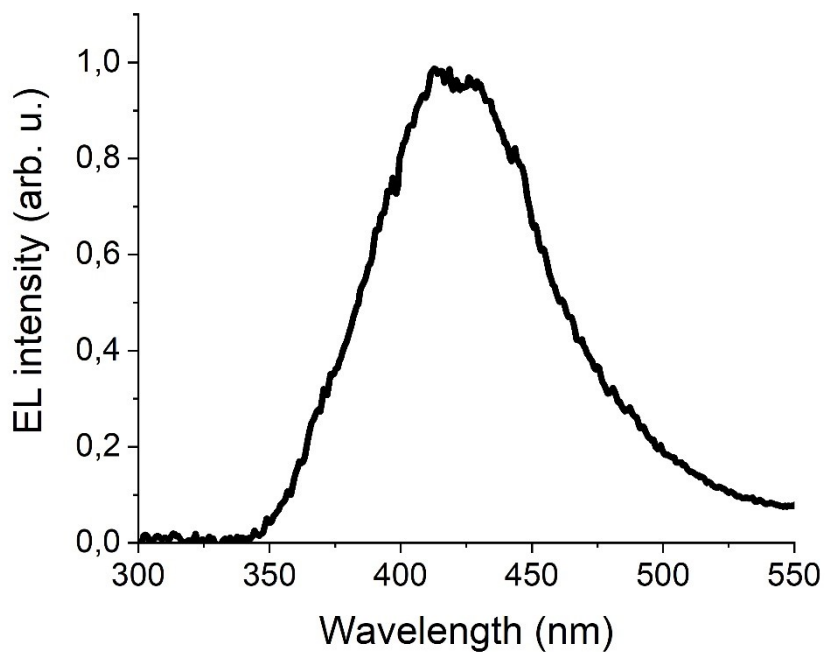

Figure S16. EL spectrum of a device with neat PVK as the emitter.

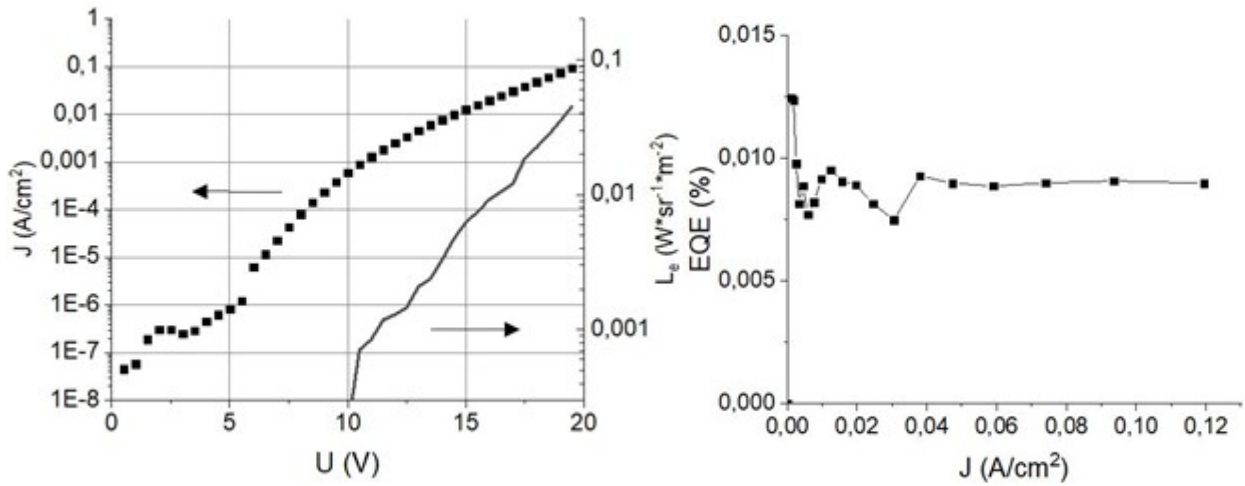

Figure S17. J-V- $L_e$  curves and EQE of ITO / PEDOT:PSS / PVK / 40% F8BT : 10% F8BT-TTBT : 50% DTDPAAB / TPBi / Ba / Al device.

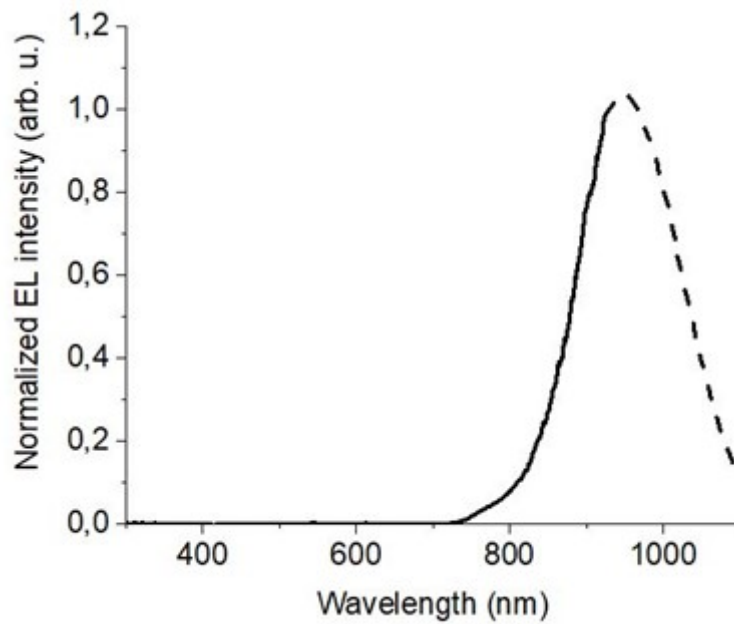

Figure S18. EL at 100 mA/cm<sup>2</sup> of ITO / ZnO / PEIE / 40% F8BT : 10% F8BT-TTBT : 50% DTDPAAB / CBP / MoO<sub>3</sub> / Al device. Dashed line shows simulated extrapolation of the spectrum.

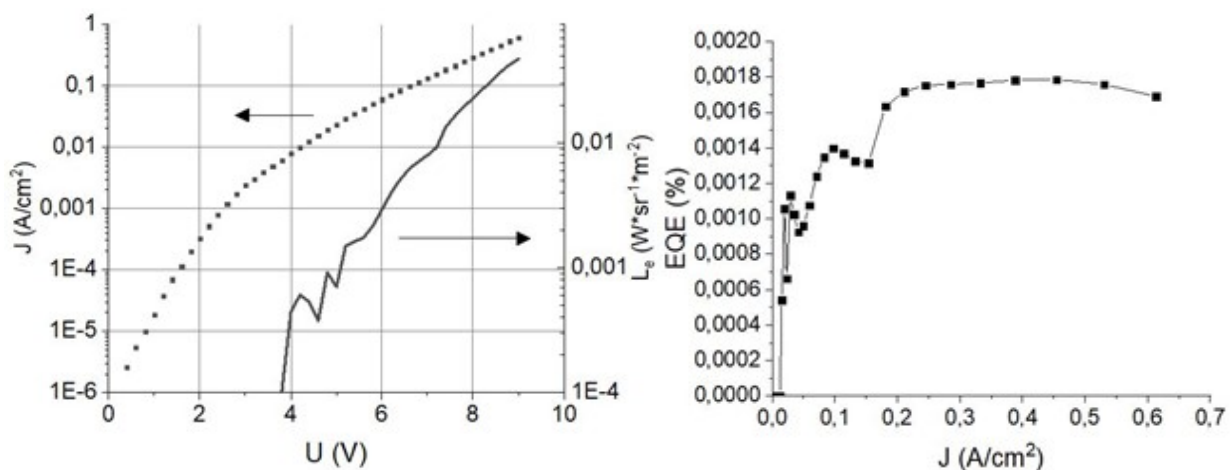

Figure S19. J-V- $L_e$  curves and EQE of ITO / ZnO / PEIE / 40% F8BT : 10% F8BT-TTBT : 50% DTDPA / CBP / MoO<sub>3</sub> / Al device.

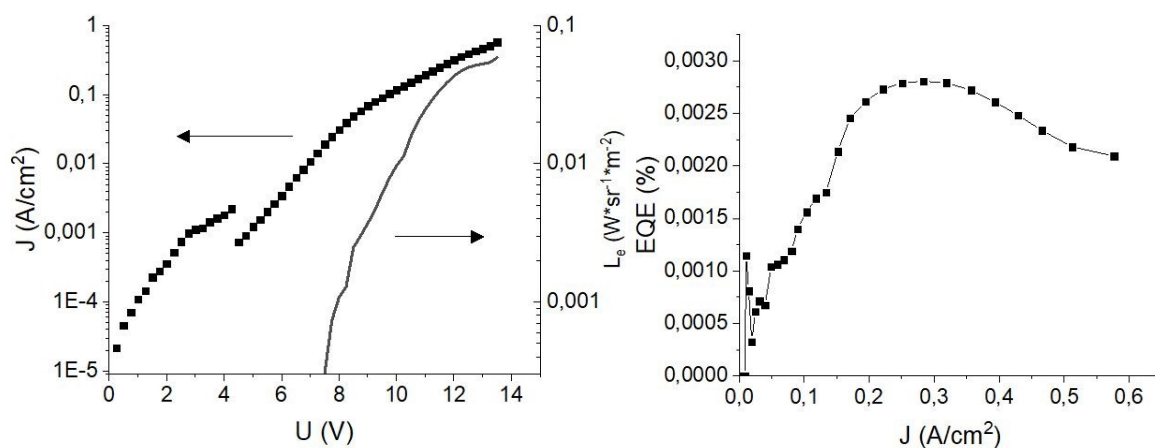

Figure S20. J-V- $L_e$  curves and EQE of ITO / ZnO / PEIE / 40% F8BT : 10% F8BT-TTBT : 50% DTDPA / CBP / Au device.

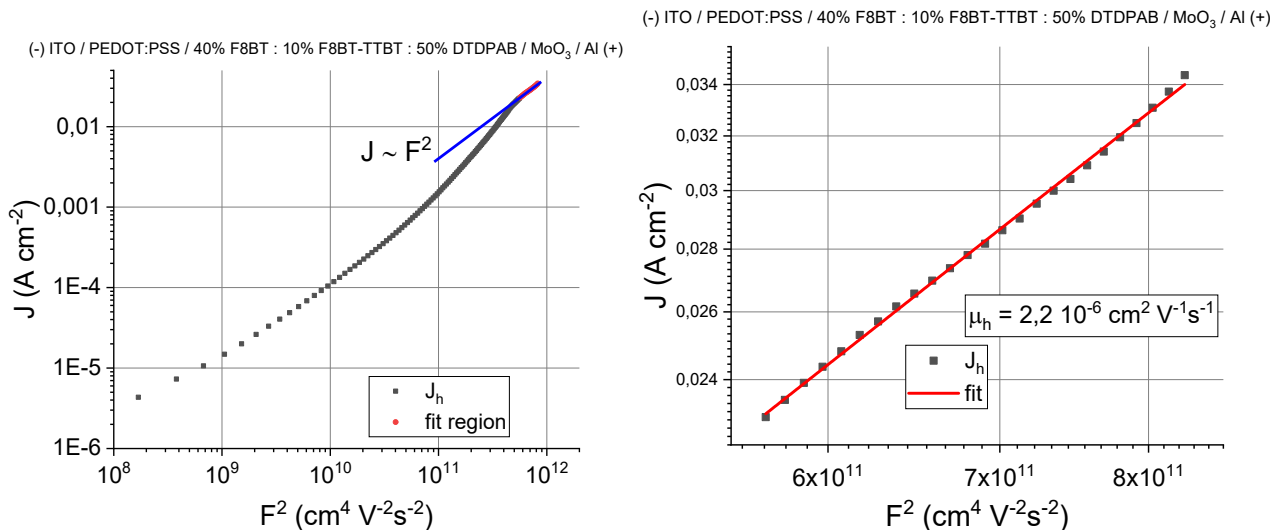

Figure S21. J-F<sup>2</sup> curve of the hole-only device ITO / PEDOT:PSS / 40% F8BT : 10% F8BT-TTBT : 50% DTDPA B / MoO<sub>3</sub> / Al and the best linear fit with the Mott-Gurney law to the hole current density in the electric field range where space charge limited current was recorded ( $J \sim F^2$ ).

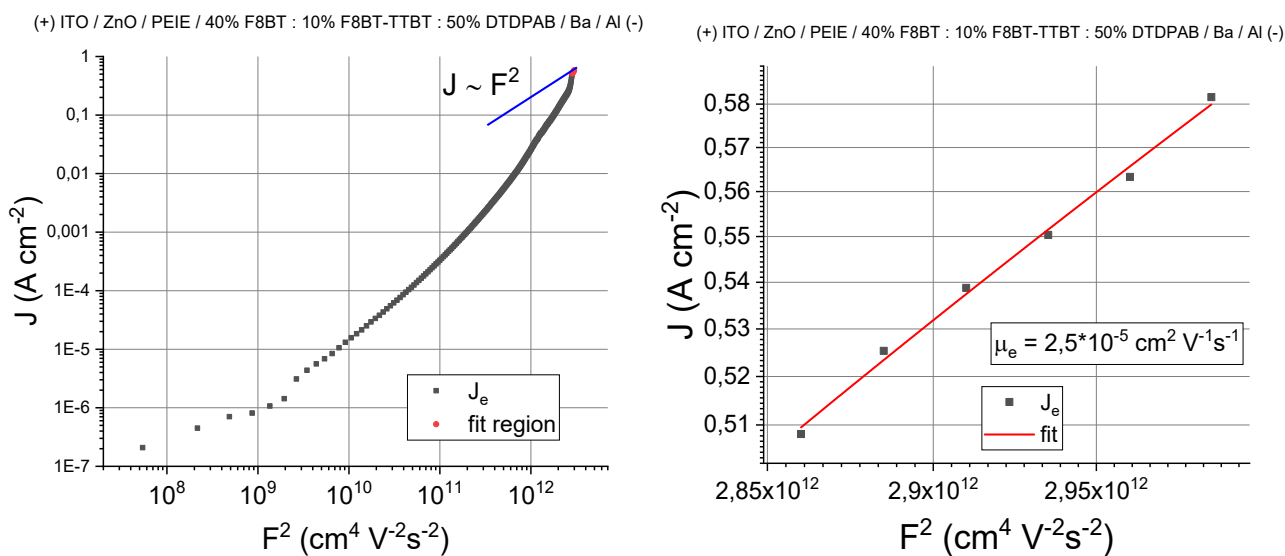

Figure S22. J-F<sup>2</sup> curve of the electron-only device ITO / ZnO / PEIE / 40% F8BT : 10% F8BT-TTBT : 50% DTDPA B / Ba / Al and the best linear fit with the Mott-Gurney law to the electron current density in the electric field range where space charge limited current was recorded ( $J \sim F^2$ ).

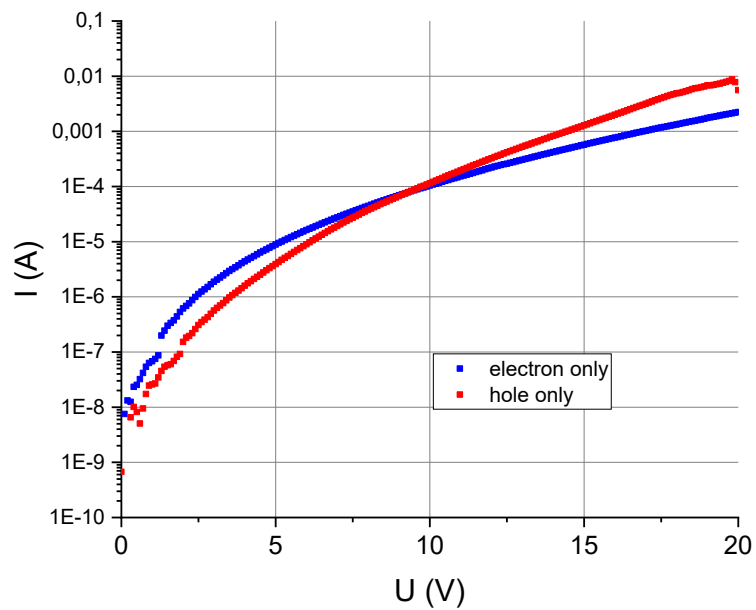

Figure S23. Electron and hole currents in the electron-only device ITO / ZnO / PEIE / 40% F8BT : 10% F8BT-TTBT : 50% DTDPA / CBP / Ba / Al and hole-only device ITO / PEDOT:PSS / 40% F8BT : 10% F8BT-TTBT : 50% DTDPA / CBP / MoO<sub>3</sub> / Al.

## References

- 1 M. D. Iosip, S. Destri, M. Pasini, W. Porzio, K. P. Pernstich and B. Batlogg, *Synthetic Metals*, 2004, **146**, 251–257.
